# Supplementary material for: An Overview of Hypoglycemia in Children Including a Comprehensive Practical Diagnostic Flowchart for Clinical Use
Source: PubMed Central journal article supplement (PMC8366517; doi:10.3389/fendo.2021.684011), 2021-08-02
Supplement: Table_1.pdf [file Table_1.pdf]

**Supplemental table 1.** Major IMD groups associated with hypoglycaemia. Most common Glycogen storage diseases, Fatty acid oxidation disorders and congenital disorders of glycosylation are included.

| <b>Disorder</b>                        | <b>Gene(s)</b>                          | <b>Protein</b>                                        | <b>Inheritance</b>  |
|----------------------------------------|-----------------------------------------|-------------------------------------------------------|---------------------|
| GSD0a                                  | <i>GYS2</i>                             | Liver glycogen synthase                               | Autosomal recessive |
| GSD0b                                  | <i>GYS1</i>                             | Muscle glycogen synthase                              | Autosomal recessive |
| GSDIa                                  | <i>G6PC</i>                             | Glucose 6-phosphatase $\alpha$                        | Autosomal recessive |
| GSDIb                                  | <i>SLC37A4</i>                          | Glucose 6-phosphate transporter                       | Autosomal recessive |
| GSDII (Pompe disease)                  | <i>GAA</i>                              | lysosomal $\alpha$ -glucosidase                       | Autosomal recessive |
| GSDIII                                 | <i>AGL</i>                              | Glycogen debrancher enzyme                            | Autosomal recessive |
| GSDIV                                  | <i>GBE1</i>                             | Glycogen brancher enzyme                              | Autosomal recessive |
| GSDV                                   | <i>PYGM</i>                             | Muscle glycogen phosphorylase                         | Autosomal recessive |
| GSDVI                                  | <i>PYGL</i>                             | Liver glycogen phosphorylase                          | Autosomal recessive |
| GSDVII                                 | <i>PFKM</i>                             | Muscle phosphofructokinase                            | Autosomal recessive |
| GSDIXa                                 | <i>PHKA2</i>                            | Glycogen phosphorylase kinase $\alpha 2$              | X-linked recessive  |
| GSDIXb                                 | <i>PHKB</i>                             | Glycogen phosphorylase kinase $\beta$                 | Autosomal recessive |
| GSDIXc                                 | <i>PHKG2</i>                            | Glycogen phosphorylase kinase $\gamma$                | Autosomal recessive |
| GSDIXd                                 | <i>PHKA1</i>                            | Glycogen phosphorylase kinase $\alpha 1$              | X-linked recessive  |
| GSDX                                   | <i>PGAM2</i>                            | Muscle phosphoglycerate mutase                        | Autosomal recessive |
| GSDXI (Fanconi-Bickel)                 | <i>SLC2A2</i>                           | GLUT2                                                 | Autosomal recessive |
| GSDXII                                 | <i>ALDOA</i>                            | Aldolase A                                            | Autosomal recessive |
| GSDXIII                                | <i>ENO3</i>                             | $\beta$ -enolase                                      | Autosomal recessive |
| GSDXIV                                 | <i>PGM1</i>                             | Phosphoglucomutase                                    | Autosomal recessive |
| GSDXV                                  | <i>GYG1</i>                             | Muscle glycogenin deficiency                          | Autosomal recessive |
| Hereditary fructose intolerance        | <i>ALDOB</i>                            | Aldolase B                                            | Autosomal recessive |
| Classical galactosemia                 | <i>GALT</i>                             | Galactose-1p uridyltransferase                        | Autosomal recessive |
| Fructose 1,6-Bisphosphatase deficiency | <i>FBP1</i>                             | Fructose 1,6-Bisphosphatase                           | Autosomal recessive |
| Pyruvate carboxylase deficiency        | <i>PC</i>                               | Pyruvate carboxylase                                  | Autosomal recessive |
| Methylmalonic acidemia                 | <i>MMUT, MMA A, MMAB, MMA DHC, MCEE</i> | Methylmalonil-CoA mutase, Methylmalonil-CoA epimerase | Autosomal recessive |

## Pediatric hypoglycemia diagnostic flowchart

|                                                                                                             |                                                   |                                                                                                             |                     |
|-------------------------------------------------------------------------------------------------------------|---------------------------------------------------|-------------------------------------------------------------------------------------------------------------|---------------------|
| Propionic acidemia                                                                                          | <i>PCCA, PCCB</i>                                 | Propionyl-CoA carboxylase                                                                                   | Autosomal recessive |
| Isovaleric acidemia                                                                                         | <i>IVD</i>                                        | Isovaleryl-Coa dehydrogenase                                                                                | Autosomal recessive |
| Carnitine transporter deficiency                                                                            | <i>SLC22A5</i>                                    | Carnitine transporter                                                                                       | Autosomal recessive |
| Carnitine palmitoyltransferase I (CPT I) deficiency                                                         | <i>CPT1</i>                                       | Carnitine palmitoyltransferase I                                                                            | Autosomal recessive |
| Carnitine acylcarnitine translocase (CACT) deficiency                                                       | <i>SLC25A20</i>                                   | Carnitine acylcarnitine translocase                                                                         | Autosomal recessive |
| Carnitine palmitoyltransferase II (CPT II) deficiency                                                       | <i>CPT2</i>                                       | Carnitine palmitoyltransferase II                                                                           | Autosomal recessive |
| Very-long-chain acyl-CoA dehydrogenase (VLCAD) deficiency                                                   | <i>ACADVL</i>                                     | Very-long-chain acyl-CoA dehydrogenase                                                                      | Autosomal recessive |
| Long-chain 3-hydroxyacyl-CoA dehydrogenase (LCHAD) and mitochondrial trifunctional protein (MTP) deficiency | <i>HADHA, HADHB</i>                               | Long-chain 3-hydroxyacyl-CoA dehydrogenase, Long-chain enoyl-CoA hydratase, Long-chain ketoacylCoA thiolase | Autosomal recessive |
| Medium-chain acyl-CoA dehydrogenase (MCAD) deficiency                                                       | <i>ACADM</i>                                      | Medium-chain acyl-CoA dehydrogenase                                                                         | Autosomal recessive |
| Short-chain acyl-CoA dehydrogenase (SCAD) deficiency                                                        | <i>ACADS</i>                                      | Short-chain acyl-CoA dehydrogenase                                                                          | Autosomal recessive |
| 3-Hydroxyacyl-CoA dehydrogenase (SCHAD) deficiency                                                          | <i>HADH</i>                                       | 3-hydroxyacyl-CoA dehydrogenase                                                                             | Autosomal recessive |
| Multiple acyl-CoA dehydrogenase (MAD) deficiency                                                            | <i>ETF A, ETF B, ETF D H</i>                      | Electron transfer flavoproteins                                                                             | Autosomal recessive |
| Riboflavin metabolism defects                                                                               | <i>SLC52A1, SLC52A2, SLC52A3, FLAD1, SLC25A32</i> | RFVT1, RFVT2, RFVT3, FAD synthase, FAD transporter                                                          | Autosomal recessive |
| 3-Hydroxy-3-Methylglutaryl-CoA (HMG-CoA) Synthase Deficiency                                                | <i>HMGCS2</i>                                     | 3-Hydroxy-3-Methylglutaryl-CoA synthase                                                                     | Autosomal recessive |
| HMG-CoA Lyase Deficiency                                                                                    | <i>HMGCL2</i>                                     | 3-Hydroxy-3-Methylglutaryl-CoA lyase                                                                        | Autosomal recessive |
| Succinyl-CoA:3-oxoacid CoA transferase (SCOT) deficiency                                                    | <i>OXCT1</i>                                      | Succinyl-CoA:3-oxoacid CoA transferase                                                                      | Autosomal recessive |
| Mitochondrial acetoacetyl-CoA thiolase (T2) deficiency                                                      | <i>ACAT1</i>                                      | Acetoacetyl-CoA thiolase                                                                                    | Autosomal recessive |
| Monocarboxylate transporter 1 (MCT1) deficiency                                                             | <i>SLC16A1</i>                                    | Monocarboxylate transporter 1                                                                               | Autosomal recessive |
| OXPPOS disorders                                                                                            | <i>Multiple genes</i>                             | Respiratory complexes subunits                                                                              | Variable            |
| Phosphomannose isomerase (MPI-CDG) deficiency                                                               | <i>PMI</i>                                        | Phosphomannose isomerase                                                                                    | Autosomal recessive |
| Phosphomannomutase 2 (PMM2-CDG) deficiency                                                                  | <i>PMM2</i>                                       | Phosphomannomutase 2                                                                                        | Autosomal recessive |
